# Supplementary material for: First Evidence and Predictions of Plasmodium Transmission in Alaskan Bird Populations
Source: PubMed Central journal article supplement (PMC3446979; doi:10.1371/journal.pone.0044729), 2012-09-19
Supplement: pone.0044729.s002.pdf [file pone.0044729.s002.pdf]

**Table S2**

List and number of individuals captured (resident (R) vs. migratory (M)) and *Plasmodium* lineages (Genbank accession number) found by species and location.

| Species                | N   | R/M | N <sub>inf</sub> | Location  | Lineage                          |
|------------------------|-----|-----|------------------|-----------|----------------------------------|
| Alder flycatcher       | 7   | M   | 1                | Coldfoot  | <i>Plasmodium</i> P48 (DQ659586) |
| American robin         | 17  | M   | 1                | Anchorage | <i>Plasmodium</i> P43 (DQ839065) |
| Black-capped chickadee | 46  | R   | 4                | Fairbanks | <i>Plasmodium</i> P43            |
| Blackpoll warbler      | 3   | M   | -                |           |                                  |
| Boreal chickadee       | 13  | R   | 3                | Anchorage | <i>Plasmodium</i> P43            |
| Brown creeper          | 2   | R   | -                |           |                                  |
| Common redpoll         | 78  | R   | -                |           |                                  |
| Downy woodpecker       | 2   | R   | -                |           |                                  |
| Fox sparrow            | 11  | M   | 1                | Anchorage | <i>Plasmodium</i> P43            |
| Golden-crowned kinglet | 2   | M   | -                |           |                                  |
| Golden-crowned sparrow | 2   | M   | -                |           |                                  |
| Gray jay               | 9   | R   | -                |           |                                  |
| Hermit thrush          | 46  | M   | 8                | Anchorage | <i>Plasmodium</i> P43            |
| Lincoln sparrow        | 3   | M   | -                |           |                                  |
| Myrtle warbler         | 123 | M   | 3                | Fairbanks | <i>Plasmodium</i> P43            |
|                        |     |     | 1                | Fairbanks | <i>Plasmodium</i> AK4 (JQ026527) |
|                        |     |     | 1                | Coldfoot  | <i>Plasmodium</i> P1 (AY377128)  |
| Northern waterthrush   | 8   | M   | 1                | Coldfoot  | <i>Plasmodium</i> 54 (AF465554)  |
| Orange crowned warbler | 10  | M   | 1                | Coldfoot  | <i>Plasmodium</i> P48            |
| Olive sided flycatcher | 1   | M   | -                |           |                                  |
| Pine grosbeak          | 1   | R   | -                |           |                                  |
| Pine siskin            | 4   | R   | -                |           |                                  |
| Red-breasted nuthatch  | 2   | R   | -                |           |                                  |
| Ruby crowned kinglet   | 1   | M   | 1                | Coldfoot  | <i>Plasmodium</i> P48            |
| Slate-colored junco    | 89  | M   | 1                | Coldfoot  | <i>Plasmodium</i> P48            |
| Swainson's thrush      | 149 | M   | 1                | Anchorage | <i>Plasmodium</i> P48            |
|                        |     |     | 1                | Anchorage | <i>Plasmodium</i> AK3 (JQ026526) |
|                        |     |     | 3                | Fairbanks | <i>Plasmodium</i> P48            |
|                        |     |     | 4                | Fairbanks | <i>Plasmodium</i> P43            |
|                        |     |     | 1                | Fairbanks | <i>Plasmodium</i> AK3            |
|                        |     |     | 1                | Coldfoot  | <i>Plasmodium</i> AK2 (JQ026525) |
|                        |     |     | 6                | Coldfoot  | <i>Plasmodium</i> P48            |
|                        |     |     | 3                | Coldfoot  | <i>Plasmodium</i> P43            |
| Varied thrush          | 11  | M   | 2                | Anchorage | <i>Plasmodium</i> P43            |
| White crowned sparrow  | 21  | M   | -                |           |                                  |
| White winged crossbill | 2   | R   | -                |           |                                  |
| Wilson's warbler       | 9   | M   | -                |           |                                  |
| Yellow warbler         | 4   | M   | -                |           |                                  |
