# Supplementary material for: First Evidence and Predictions of Plasmodium Transmission in Alaskan Bird Populations
Source: PLoS One. 2012 Sep 19;7(9):e44729. doi: 10.1371/journal.pone.0044729 (PMC3446979; doi:10.1371/journal.pone.0044729)
Supplement: Supporting Information S1 — (PDF) [file pone.0044729.s003.pdf]

## Supplemental Information

**Bioclimatic and habitat variables description.** We used a set of moderately high-resolution climate and satellite remote sensing variables to characterize the habitat differences among our sampling areas. Variables were re-aggregated from their native resolutions to 5 km resolution (Table S1).

### 1- Bioclimatic variables

We used 7 bioclimatic variables (representing both temperature and precipitation, while excluding those that showed high degrees of autocorrelation) from the WorldClim database<sup>1</sup> which are 50-year averages (1950-2000) of annual means, seasonal extremes and degrees of seasonality in temperature and precipitation, and represent biologically meaningful variables for characterizing species range<sup>2,3</sup>: (<http://bioge.berkeley.edu/worldclim/bioclim.htm>)

BIO1 = Annual Mean Temperature (degree Celsius, °C)

BIO4 = Temperature Seasonality (standard deviation \*100)

BIO5 = Max Temperature of Warmest Month (degree Celsius, °C)

BIO6 = Min Temperature of Coldest Month (degree Celsius, °C)

BIO12 = Annual Precipitation

BIO15 = Precipitation Seasonality (Coefficient of Variation)

BIO19 = Precipitation of Coldest Quarter

## 2- Surface moisture and canopy roughness

From QuikScat (QSCAT;

[http://www.scp.byu.edu/data/Quikscat/SIRv2/qush/World\\_regions.htm](http://www.scp.byu.edu/data/Quikscat/SIRv2/qush/World_regions.htm)), we obtained monthly

raw backscatter measurements that capture attributes related to surface moisture and canopy

roughness<sup>4</sup>: Qscat Mean: Annual mean Radar Backscatter of year 2001 (*for spatial distribution of surface moisture and roughness (forest structure)*); less negative means higher backscatter.

Unit: Decibel

## 4- Normalized Difference Vegetation Index

We used the index NDVI (Normalized Difference Vegetation Indices; based on monthly files

from the year 2001 of MODIS Data (1km resolution)): NDVI max: Annual maximum NDVI (*for spatial distribution of vegetation density*)

## 5- Percent Tree Cover

We used the vegetation continuous field<sup>5</sup> product from MODIS

([https://lpdaac.usgs.gov/lpdaac/products/modis\\_overview](https://lpdaac.usgs.gov/lpdaac/products/modis_overview)) as a measure of the percentage of tree cover in 2001.

## References

1. Hijmans, R. J., Cameron, S.E., Parra, J. L., Jones, P.G. & Jarvis, A. Very high resolution interpolated climate surfaces for global land areas. *Int. J. Climat.* **25**, 1965-1978 (2005).
2. Nix, H. A biogeographic analysis of Australian elapid snakes. Atlas of Elapid Snakes of Australia. Australian Government Publishing Service (1986).
3. Sehgal, R. N. M. *et al.* Spatially explicit predictions of blood parasites in a widely distributed African rainforest bird. *Proc. R. Soc. Lond. B.* **278**, 1025-1033 (2011).
4. Long, D. G., Drinkwater, M.R., Holt, B., Saatchi, S. & Bertoia, C. Global Ice and Land Climate Studies Using Scatterometer Image Data. *EOS Transactions AGU* **82**, 503 (2001).
5. Hansen, M. C. *et al.* Towards an operational MODIS continuous field of percent tree cover algorithm: examples using AVHRR and MODIS data. *Remote Sensing Envir.* **83**, 303-319 (2002).
