# Supplementary material for: First Evidence and Predictions of Plasmodium Transmission in Alaskan Bird Populations
Source: PLoS One. 2012 Sep 19;7(9):e44729. doi: 10.1371/journal.pone.0044729 (PMC3446979; doi:10.1371/journal.pone.0044729)
Supplement: Table S1 — Bioclimatic and habitat variables per location. (PDF) [file pone.0044729.s001.pdf]

**Table S1**

Bioclimatic and habitat variables per location.

| Location  | Site           | Latitude (N) | Longitude (W) | BIO1 | BIO4  | BIO5 | BIO6  | BIO12 | BIO15 | BIO19 | NDVI  | QSCAT | Tree cover |
|-----------|----------------|--------------|---------------|------|-------|------|-------|-------|-------|-------|-------|-------|------------|
| Anchorage | Potter Marsh   | 61°04'17.62" | 149°48'26.20" | 2.1  | 8671  | 18.4 | -13.8 | 490   | 45    | 104   | 8286  | -1149 | 60         |
| Anchorage | South Bivouac  | 61°09'19.25" | 149°44'45.88" | 1.6  | 8716  | 18.1 | -14.4 | 479   | 44    | 101   | 8699  | -912  | 72         |
| Anchorage | Campbell Creek | 61°09'50.00" | 149°46'11.85" | 1.8  | 8837  | 18.3 | -14.5 | 464   | 45    | 96    | 8815  | -864  | 62         |
| Fairbanks | Creamers Field | 64°52'03.20" | 147°44'52.16" | -2.9 | 14410 | 22.3 | -27.3 | 318   | 47    | 58    | 8462  | -968  | 39         |
| Coldfoot  | Rosie Creek S  | 67°10'52.06" | 150°18'19.06" | -7.5 | 14672 | 19.9 | -31.8 | 295   | 58    | 45    | 7688  | -1107 | 0          |
| Coldfoot  | Rosie Creek N  | 67°11'44.66" | 150°16'45.96" | -7.4 | 14715 | 20.1 | -31.7 | 294   | 58    | 45    | 7966  | -1107 | 14         |
| Coldfoot  | Slate Creek    | 67°14'06.23" | 150°07'52.90" | -7.3 | 14763 | 20.3 | -31.8 | 289   | 57    | 43    | 7854  | -1107 | 35         |
| Coldfoot  | Marion Creek   | 67°19'07.35" | 150°09'23.64" | -7.4 | 14771 | 20.2 | -31.9 | 285   | 58    | 43    | 77827 | -1085 | 23         |
